# Supplementary material for: Glycolipid metabolism and liver transcriptomic analysis of the therapeutic effects of pressed degreased walnut meal extracts on type 2 diabetes mellitus rats
Source: Royal Society of Chemistry journal article supplement (doi:10.1039/d0fo00670j), 2020-01-01
Supplement: d0fo00670j1.pdf [file d0fo00670j1.pdf]

Figure 1S The heat maps of the genes involved in key pathways regulated by WMP in T2DM rats

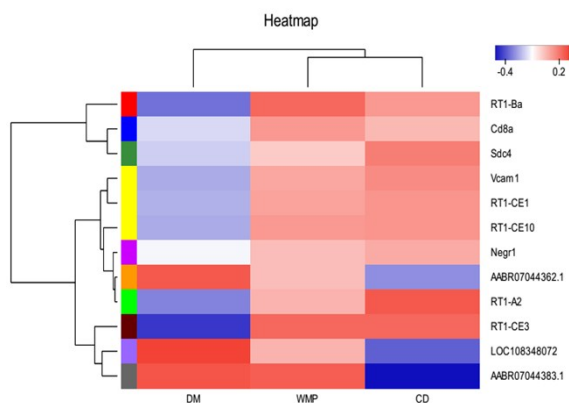

Figure 1S1 Cell adhesion molecules (CAMs) pathway

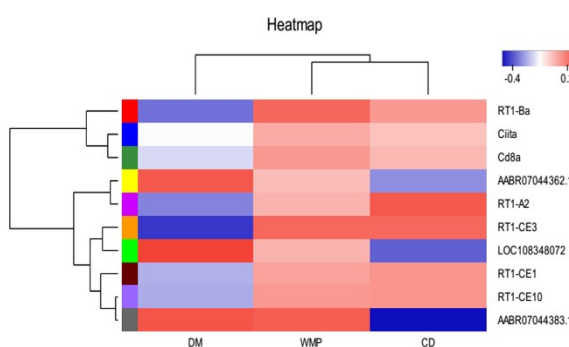

Figure 1S2 Antigen processing and presentation pathway

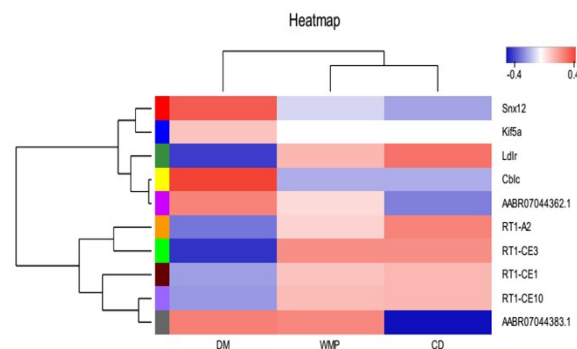

Figure 1S3 Endocytosis pathway

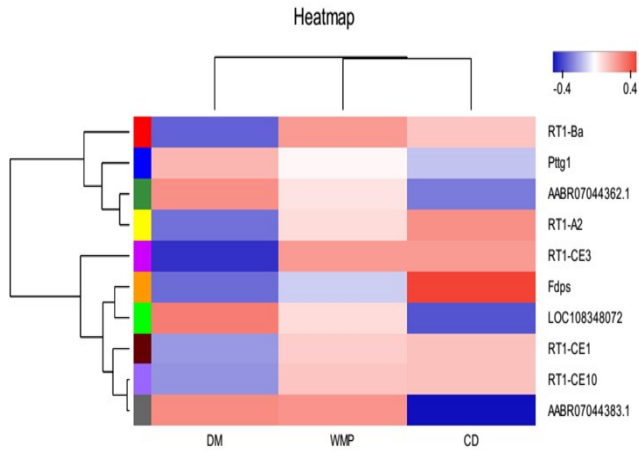

Figure 1S4 Human T-cell leukemia virus 1 infection pathway

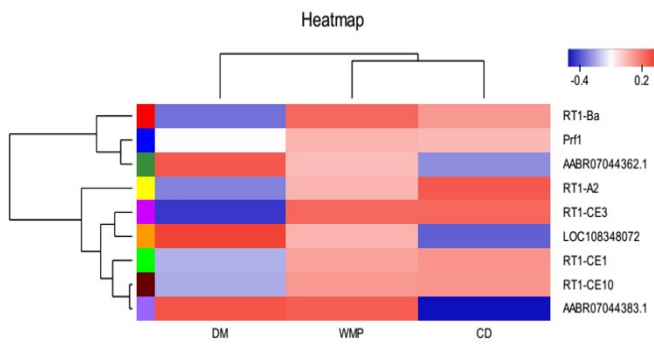

Figure 1S5 Graft-versus-host disease pathway

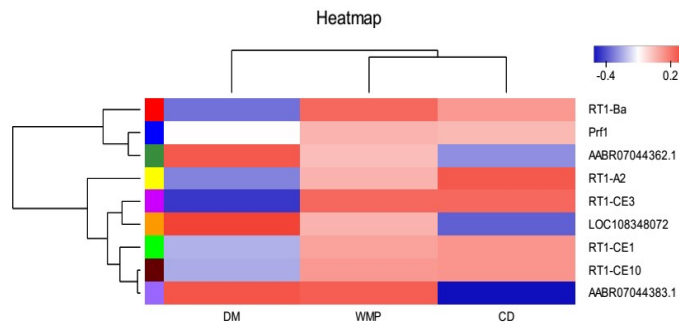

Figure 1S6 Type I diabetes mellitus pathway

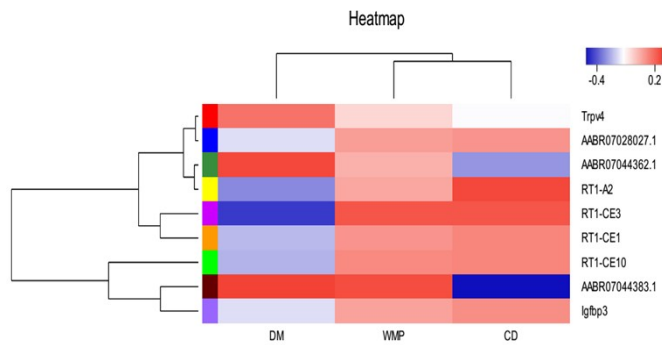

Figure 1S7 Cellular senescence pathway

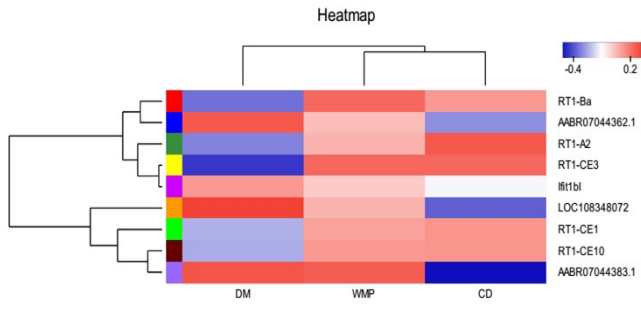

Figure 1S8 Herpes simplex infection pathway

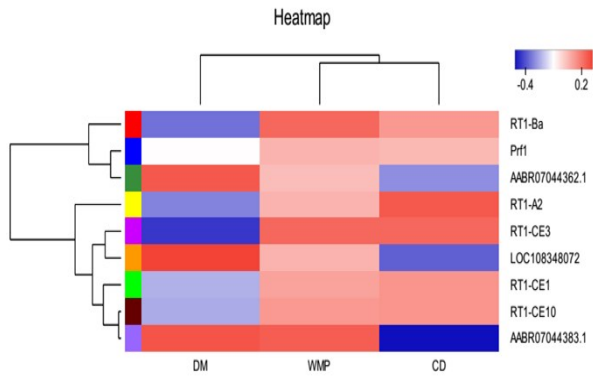

Figure 1S9 Allograft rejection pathway

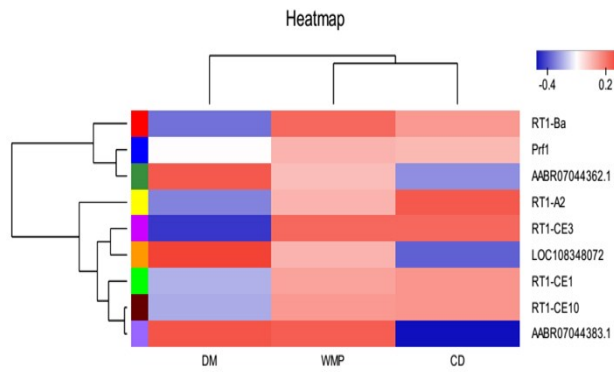

Figure 1S10 Autoimmune thyroid disease pathway

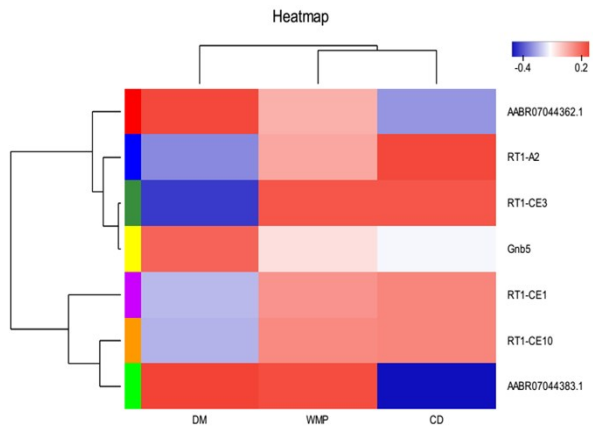

Figure 1S11 Kaposi sarcoma-associated herpesvirus infection pathway

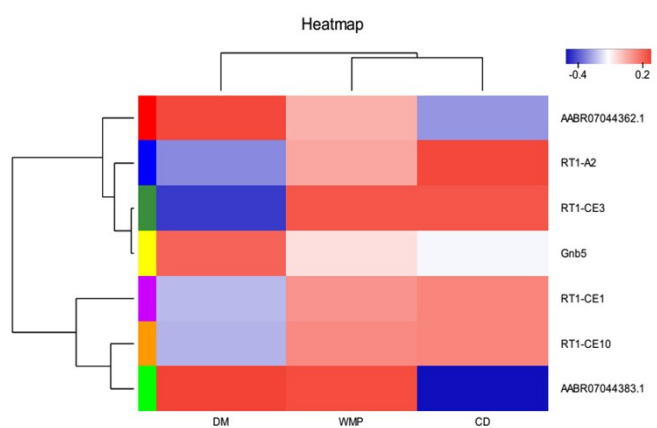

Figure 1S12 Human cytomegalovirus infection pathway

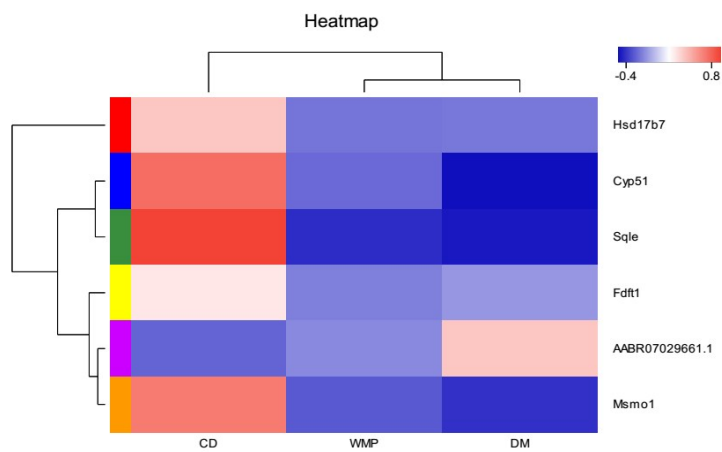

Figure 1S13 Steroid biosynthesis pathway

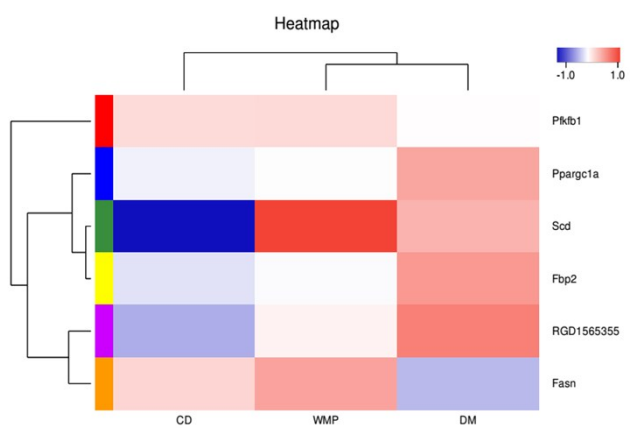

Figure 1S14 AMPK signaling pathway

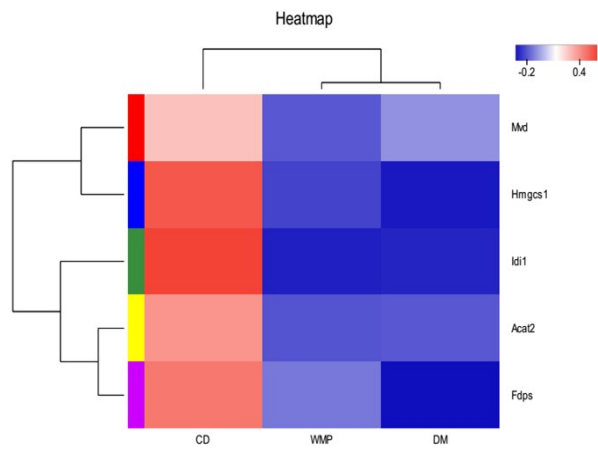

Figure 1S15 Terpenoid backbone biosynthesis pathway

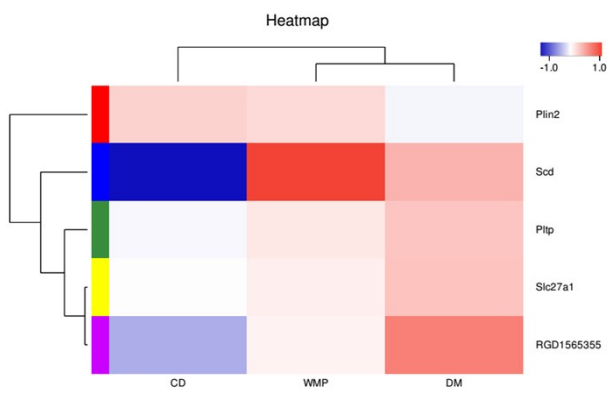

Figure 1S16 PPAR signaling pathway

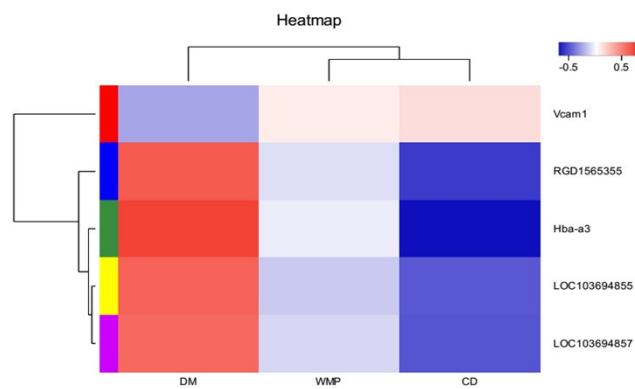

Figure 1S17 Malaria pathway

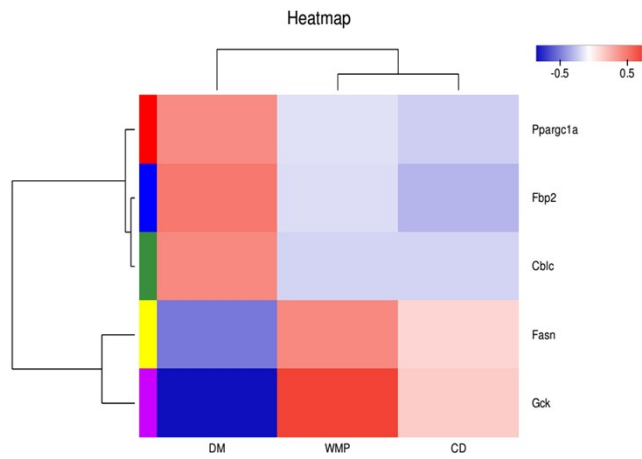

Figure 1S18 Insulin signaling pathway

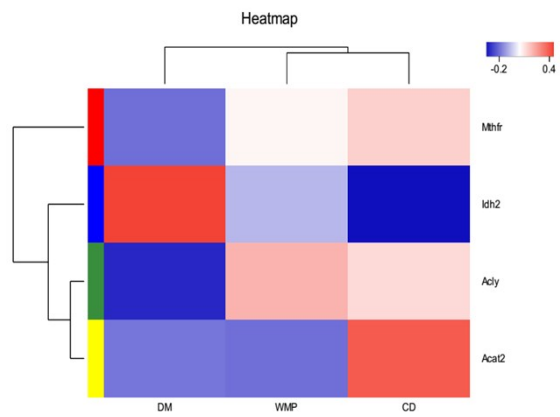

Figure 1S19 Carbon fixation pathways in prokaryotes

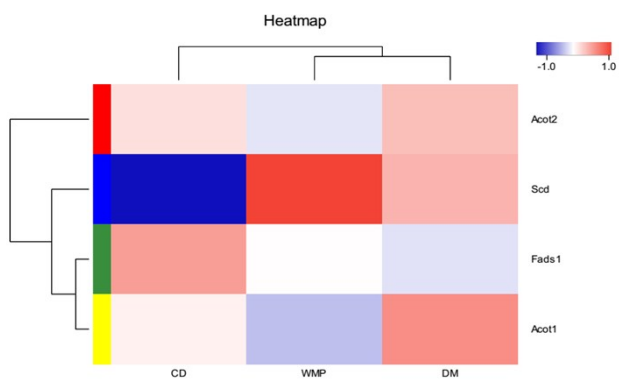

Figure 1S20 Biosynthesis of unsaturated fatty acids pathway

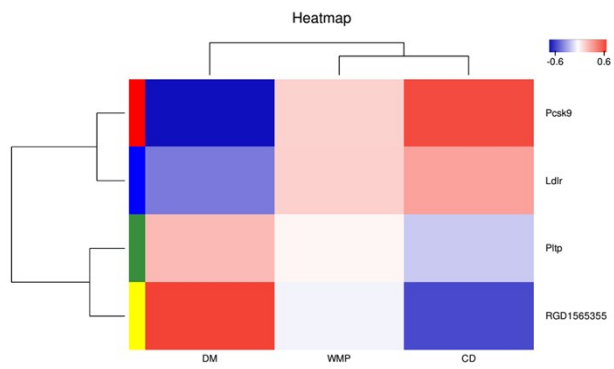

Figure 1S21 Cholesterol metabolism signal pathway

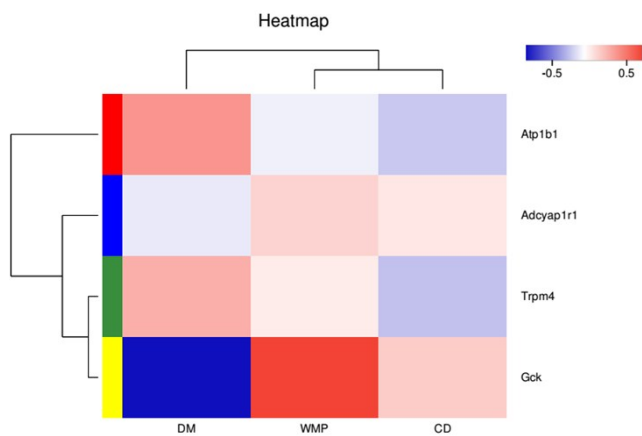

Figure 1S22 Insulin secretion pathway

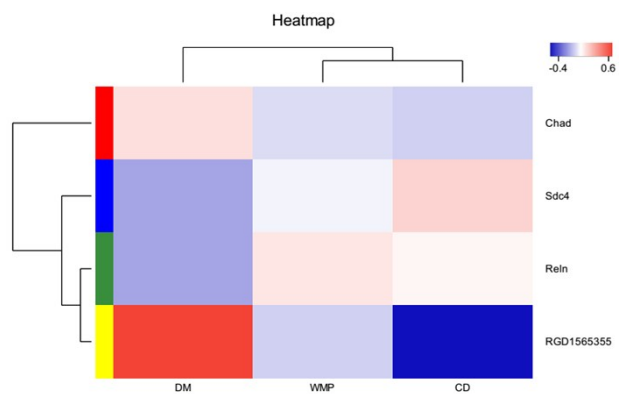

Figure 1S23 ECM-receptor interaction pathway

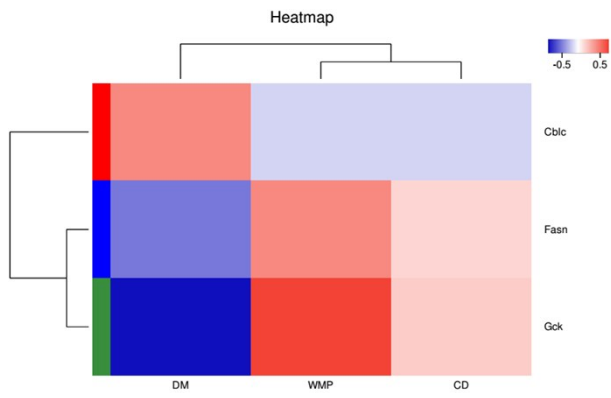

Figure 1S24 Alanine, aspartate and glutamate metabolism pathway

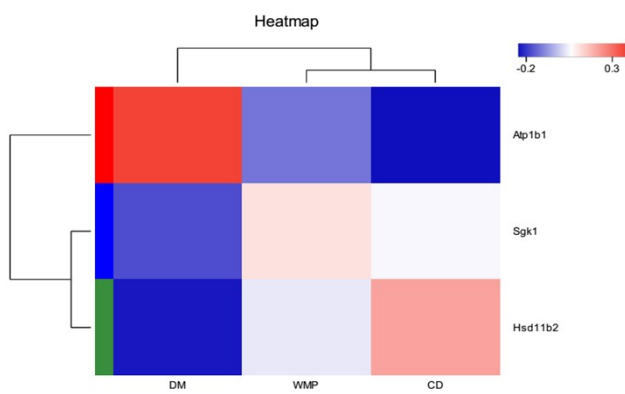

Figure 1S25 Aldosterone-regulated sodium reabsorption pathway

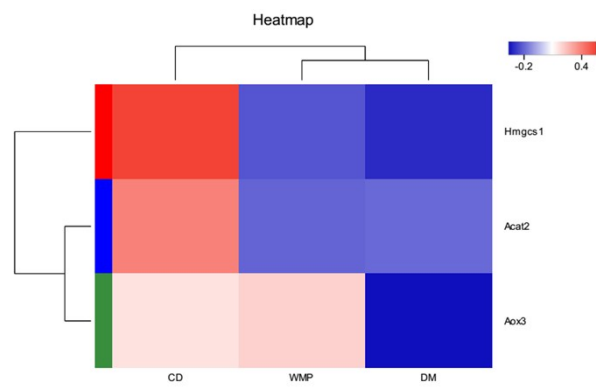

Figure 1S26 Valine, leucine and isoleucine degradation pathway
